# Supplementary material for: Alcohol Abuse, Morbid Obesity, Depression, Congestive Heart Failure, and Chronic Pulmonary Disease are Risk Factors for 90-Day Readmission After Arthroscopic Rotator Cuff Repair
Source: Elsevier journal article supplement (doi:10.1016/j.asmr.2022.06.015), 2022-08-26
Supplement: mmc1 [file mmc1.pdf]

Alcohol Abuse, Morbid Obesity, Depression, Congestive Heart Failure, and Chronic Pulmonary Disease are Risk Factors for 90-Day Readmission After Arthroscopic Rotator Cuff Repair - Arthroscopy, Sports Medicine, and Rehabilitation                  


Skip to Main Content

## Login to your account

Email/Username

Password

Show

Forgot password?

Remember me

Don’t have an account?

Create a Free Account

If you don't remember your password, you can reset it by entering your email address and clicking the Reset Password button. You will then receive an email that contains a secure link for resetting your password

Email\*

If the address matches a valid account an email will be sent to \_\_email\_\_ with instructions for resetting your password

Cancel

ADVERTISEMENT

SCROLL TO CONTINUE WITH CONTENT

Open GPT Console  
Open Oracle Keywords  
  
Refresh Values

| Property | Value |
| --- | --- |
| Status |  |
| Version |  |
| Ad File |  |
| Disable Ads Flag |  |
| Environment |  |
| Moat Init |  |
| Moat Ready |  |
| Contextual Ready |  |
| Contextual URL |  |
| Contextual Initial Segments |  |
| Contextual Used Segments |  |
| AdUnit |  |
| SubAdUnit |  |
| Custom Targeting |  |
| Ad Events |  |
| Invalid Ad Sizes |  |

- Submit
- Log in
- Register
- Log in

  - Submit
  - Log in

Access provided by

Skip menu

- Articles

  - #### Latest

    - Articles in Press
    - Current issue
    - Past Issues
    - ASMAR Special Issue: Rehabilitation and Return to Sport in Athletes
  - ## Popular Articles

    - Original Article

      Open Access

      #### Approximately One Half of Patients Greater Than 40 Years Old Achieve Patient Acceptable Symptomatic State 6 Months After Arthroscopic Partial Meniscectomy

      Bisson et al.
    - Rehabilitation and Return to Sport in Athletes

      Open Access

      #### Capsulolabral Adhesions After Hip Arthroscopy for the Treatment of Femoroacetabular Impingement: Strategies During Rehabilitation and Return to Sport to Reduce the Risk of Revision

      Philippon et al.
    - Original Article

      Open Access

      #### Patients Aged 50 Years and Older Have Greater Complication Rates After Anterior Cruciate Ligament Reconstruction: A Large Database Study

      Salesky et al.
  - ## Latest Content

    - Original Article

      Open Access

      #### High Return to Play Rate and Diminished Career Longevity are Seen Following Arthroscopic Shoulder Labral Repair in Major League Baseball Players

      Castle et al.
    - Original Article

      Open Access

      #### Postoperative Tunnel Widening, Elliptical Aperture Shape, and No Preservation of the Remnant Are Related to the Tendon Graft–Bone Tunnel Gap Formation at the Intra-Articular Aperture After Double-Bundle Anterior Cruciate Ligament Reconstruction

      Kanto et al.
    - Original Article

      Open Access

      #### YouTube Is a Poor-Quality Source for Patient Information Regarding Patellar Dislocations

      Abed et al.
- Publish

  - #### For Authors

    - Submit ArticleExternal Link
    - Guide for Authors
    - Aims & Scope
    - Open Access InformationExternal Link
    - Ethics in Publishing
    - Original Article TemplateExternal Link
    - Original Article ChecklistExternal Link
    - Systematic Review & Meta-analysis TemplateExternal Link
    - Systematic Review & Meta-analysis ChecklistExternal Link
  - #### For Reviewers

    - Reviewer LoginExternal Link
    - Sign Up to Review
- About

  - - AANAExternal Link
    - Editorial BoardExternal Link
  - #### Journal Information

    - Aims & Scope
    - Permissions
    - ReprintsExternal Link
    - Abstracting & Indexing
  - #### Companion Journals

    - ArthroscopyExternal Link
    - Arthroscopy TechniquesExternal Link
- Contact

  - #### Contact

    - Contact Us
    - Advertise with UsExternal Link
    - Go to Product CatalogExternal Link
  - #### Follow Us

    - New Content Alerts
    - TwitterExternal Link
    - FacebookExternal Link
    - InstagramExternal Link
    - LinkedInExternal Link

Go searchAdvanced search

All contentArticle titleAuthorsKeywordsAbstractArticle title, abstract, keywordsAdvanced search

Please enter a term before submitting your search.

 Ok

Original Article|
Volume 4, ISSUE 5, e1683-e1691, October 2022

Download Full Issue

Download started.

 Ok

- Save

  - Add To Online LibraryPowered ByMendeley
  - Add To My Reading List
  - Export Citation
  - Create Citation Alert
- Share

  Share on
  - Twitter
  - Facebook
  - Linked In
  - Sina Weibo
  - Email
- more

  - Reprints
  - Request
- Top

# Alcohol Abuse, Morbid Obesity, Depression, Congestive Heart Failure, and Chronic Pulmonary Disease are Risk Factors for 90-Day Readmission After Arthroscopic Rotator Cuff Repair

- Gagan Grewal, M.D. 

  Gagan Grewal

  Affiliations

  Holy Cross Orthopedic Institute, Fort Lauderdale, Florida, U.S.A.

  Search for articles by this author
- Teja Polisetty, B.S. 

  Teja Polisetty

  Affiliations

  Holy Cross Orthopedic Institute, Fort Lauderdale, Florida, U.S.A.

  Search for articles by this author
- Dylan Cannon, M.D. 

  Dylan Cannon

  Affiliations

  Holy Cross Orthopedic Institute, Fort Lauderdale, Florida, U.S.A.

  Search for articles by this author
- Andrew Ardeljan, B.S. 

  Andrew Ardeljan

  Affiliations

  NOVA Southeastern University, College of Osteopathic Medicine, Fort Lauderdale, Florida, U.S.A.

  Search for articles by this author
- Rushabh M. Vakharia, M.D. 

  Rushabh M. Vakharia

  Affiliations

  Holy Cross Orthopedic Institute, Fort Lauderdale, Florida, U.S.A.

  Search for articles by this author
- Hugo C. Rodriguez, D.O., M.B.S. 

  Hugo C. Rodriguez

  Affiliations

  Holy Cross Orthopedic Institute, Fort Lauderdale, Florida, U.S.A.

  Search for articles by this author
- Jonathan C. Levy, M.D. 

  Jonathan C. Levy

  Correspondence

  Address correspondence to Jonathan C. Levy, M.D., Holy Cross Orthopedic Institute, 5597 N. Dixie Highway, Fort Lauderdale, FL 33334.

  Contact

  Affiliations

  Holy Cross Orthopedic Institute, Fort Lauderdale, Florida, U.S.A.

  Search for articles by this author

Open AccessPublished:August 28, 2022DOI:https://doi.org/10.1016/j.asmr.2022.06.015

Alcohol Abuse, Morbid Obesity, Depression, Congestive Heart Failure, and Chronic Pulmonary Disease are Risk Factors for 90-Day Readmission After Arthroscopic Rotator Cuff Repair

Previous ArticleArthroscopic Superior Capsule Reconstruction With Fascia Lata Autograft And In-Situ Biceps Tendon Augmentation: Feasible Outcomes After Minimum Two-Year Follow-Up

Next ArticleDecreased Upward Vertical Movement for Fastballs After Ulnar Collateral Ligament Reconstruction in Major League Baseball Pitchers

### Purpose

The purpose of this study was to report the rate and causes of 90-day readmissions
after arthroscopic rotator cuff repair.

### Methods

A retrospective query from January 2005 to March 2014 was performed using a nationwide
administrative claims registry. Patients and complications were identified using International
Classification of Disease, Ninth Revision (ICD-9) and Current Procedural Terminology
(CPT) codes. Patients who underwent arthroscopic rotator cuff repair (RCR) and were
readmitted within 90 days after their index procedure were identified. Patients not
readmitted represented controls. Patients readmitted were stratified into separate
cohorts depending on the primary cause of readmission, which included cardiac, endocrine,
hematological, infectious, gastrointestinal, musculoskeletal (MSK), neoplastic, neurological
or psychiatric, pulmonary, and renal. Risk factors assessed were comorbidities comprising
the Elixhauser-Comorbidity Index (ECI). Primary outcomes analyzed and compared included
cause for readmission, patient demographics, risk factors, in-hospital length of stay
(LOS), and costs. Pearson’s chi-square was used to compare patient demographics, and
multivariate binomial logistic regression was used to calculate odds ratios (OR) on
patient-related risk factors for 90-day readmissions.

### Results

10,425 readmitted patients and 301,625 control patients were identified, representing
a 90-day readmission rate of 3.5%. The causes of readmissions were primarily related
to infectious diseases (15%), MSK (15%), and cardiac (14%) complications. The most
common MSK readmissions were osteoarthrosis of the leg or shoulder (24.8%) and spinal
spondylosis (8.4%). Multivariate binomial logistic regression analyses demonstrated
patients with alcohol abuse (OR, 1.42; *P* < .0001), morbid obesity (OR, 1.38; *P* < .0001), depression (OR, 1.35; *P* < .0001), congestive heart failure (OR, 1.34; *P* < 0.0001), and chronic pulmonary disease (OR, 1.28; *P* < .0001) were at the greatest risk of readmissions after RCR.

### Conclusions

Significant differences exist among patients readmitted, and those patients who do
not require hospital readmission within 90 days following arthroscopic rotator cuff
repairs. Readmissions are associated with significant patient comorbidities and were
primarily related to medically based complications.

### Level of Evidence

Level III, prognostic, retrospective cohort study.

To read this article in full you will need to make a payment

One-time access price info

- For academic or personal research use, select 'Academic and Personal'
- For corporate R&D use, select 'Corporate R&D Professionals'

### Subscribe:

Subscribe to *Arthroscopy, Sports Medicine, and Rehabilitation*

Already a print subscriber? Claim online access

Already an online subscriber? Sign in

Register: Create an account

Institutional Access: Sign in to ScienceDirect

## References

1. - Day M.A.
   - Westermann R.W.
   - Bedard N.A.
   - Glass N.A.
   - Wolf B.R.

   Trends associated with open versus arthroscopic rotator cuff repair.

   *HSS J.* 2019; 15: 133-136

   View
   in Article
   - Scopus (22)
   - PubMed
   - Crossref
   - Google Scholar
2. - Zhang A.L.
   - Montgomery S.R.
   - Ngo S.S.
   - Hame S.L.
   - Wang J.C.
   - Gamradt S.C.

   Analysis of rotator cuff repair trends in a large private insurance population.

   *Arthroscopy.* 2013; 29: 623-629

   View
   in Article
   - Scopus (100)
   - PubMed
   - Abstract
   - Full Text
   - Full Text PDF
   - Google Scholar
3. - Mauro C.S.
   - Jordan S.S.
   - Irrgang J.J.
   - Harner C.D.

   Practice patterns for subacromial decompression and rotator cuff repair: An analysis of the American Board of Orthopaedic Surgery database.

   *J Bone Jt Surg-Ser A.* 2012; 94: 1492-1499

   View
   in Article
   - Scopus (37)
   - PubMed
   - Crossref
   - Google Scholar
4. - Kelly B.C.
   - Constantinescu D.S.
   - Vap A.R.

   Arthroscopic and open or mini-open rotator cuff repair trends and complication rates among American Board of Orthopaedic Surgeons Part II examinees (2007-2017).

   *Arthroscopy.* 2019; 35: 3019-3024

   View
   in Article
   - Scopus (12)
   - PubMed
   - Abstract
   - Full Text
   - Full Text PDF
   - Google Scholar
5. Hospital Readmissions Reduction Program (HRRP) | CMS.

   https://www.cms.gov/Medicare/Medicare-Fee-for-Service-Payment/AcuteInpatientPPS/Readmissions-Reduction-Program

   Date accessed: July 22, 2020

   View
   in Article
   - Google Scholar
6. - Clemens J.
   - Gottlieb J.D.

   In the shadow of a giant medicare’s influence on private physician payments.

   *J Polit Econ.* 2017; 125: 1-39

   View
   in Article
   - Scopus (103)
   - PubMed
   - Crossref
   - Google Scholar
7. - Rana A.J.
   - Bozic K.J.

   Bundled payments in orthopaedics.

   *Clin Orthop Relat Res.* 2015; 473: 422-425

   View
   in Article
   - Scopus (84)
   - PubMed
   - Crossref
   - Google Scholar
8. - Hill J.R.
   - McKnight B.
   - Pannell W.C.
   - et al.

   Risk factors for 30-day readmission following shoulder arthroscopy.

   *Arthroscopy.* 2017; 33: 55-61

   View
   in Article
   - Scopus (50)
   - PubMed
   - Abstract
   - Full Text
   - Full Text PDF
   - Google Scholar
9. - Westermann R.W.
   - Pugely A.J.
   - Ries Z.
   - et al.

   Causes and predictors of 30-day readmission after shoulder and knee arthroscopy: An analysis of 15,167 cases.

   *Arthroscopy.* 2015; 31: 1035-1040.e1

   View
   in Article
   - Scopus (44)
   - PubMed
   - Abstract
   - Full Text
   - Full Text PDF
   - Google Scholar
10. - Martin C.T.
    - Gao Y.
    - Pugely A.J.
    - Wolf B.R.

    30-day morbidity and mortality after elective shoulder arthroscopy: A review of 9410 cases.

    *J Shoulder Elb Surg.* 2013; 22: 1667-1675.e1

    View
    in Article
    - Scopus (70)
    - PubMed
    - Abstract
    - Full Text
    - Full Text PDF
    - Google Scholar
11. - Shields E.
    - Thirukumaran C.
    - Thorsness R.
    - Noyes K.
    - Voloshin I.

    An analysis of adult patient risk factors and complications within 30 days after arthroscopic shoulder surgery.

    *Arthroscopy.* 2015; 31: 807-815

    View
    in Article
    - Scopus (52)
    - PubMed
    - Abstract
    - Full Text
    - Full Text PDF
    - Google Scholar
12. - Heyer J.H.
    - Kuang X.
    - Amdur R.L.
    - Pandarinath R.

    Identifiable risk factors for thirty-day complications following arthroscopic rotator cuff repair.

    *Phys Sportsmed.* 2018; 46: 56-60

    View
    in Article
    - Scopus (19)
    - PubMed
    - Crossref
    - Google Scholar
13. - Kosinski L.R.
    - Gil J.A.
    - Durand W.M.
    - DeFroda S.F.
    - Owens B.D.
    - Daniels A.H.

    30-Day readmission following outpatient rotator cuff repair: An analysis of 18,061 cases.

    *Phys Sportsmed.* 2018; 46: 466-470

    View
    in Article
    - Scopus (12)
    - PubMed
    - Crossref
    - Google Scholar
14. - Maron S.Z.
    - Neifert S.N.
    - Ranson W.A.
    - et al.

    Elixhauser comorbidity measure is superior to Charlson Comorbidity Index in predicting hspital complications following elective posterior cervical decompression and fusion.

    *World Neurosurg.* 2020; 138: e26-e34

    View
    in Article
    - Scopus (21)
    - PubMed
    - Crossref
    - Google Scholar
15. - Gilotra M.
    - O’Brien M.J.
    - Savoie 3rd, F.H.

    Arthroscopic rotator cuff repair: Indication and technique.

    *Instr Course Lect.* 2016; 65: 83-92

    View
    in Article
    - PubMed
    - Google Scholar
16. - Clement N.D.
    - Nie Y.X.
    - McBirnie J.M.

    Management of degenerative rotator cuff tears: A review and treatment strategy.

    *Sports Med Arthrosc Rehabil Ther Technol.* 2012; 4: 48

    View
    in Article
    - Scopus (43)
    - PubMed
    - Crossref
    - Google Scholar
17. - Khazi Z.M.
    - Lu Yining
    - Cregar W.
    - et al.

    Inpatient arthropcopic rotator cuff repair is associated with higher postoperative complications compared with same-day discharge: A matched cohort analysis.

    *Arthroscopy.* 2021; 37: 42-49

    View
    in Article
    - Scopus (6)
    - PubMed
    - Abstract
    - Full Text
    - Full Text PDF
    - Google Scholar
18. - Titchener A.G.
    - White J.J.E.
    - Hinchliffe S.R.
    - Tambe A.A.
    - Hubbard R.B.
    - Clark D.I.

    Comorbidities in rotator cuff disease: A case-control study.

    *J Shoulder Elb Surg.* 2014; 23: 1282-1288

    View
    in Article
    - Scopus (67)
    - PubMed
    - Abstract
    - Full Text
    - Full Text PDF
    - Google Scholar
19. - Huang S.-W.
    - Wang W.-T.
    - Chou L.-C.
    - Liou T.-H.
    - Chen Y.-W.
    - Lin H.-W.

    Diabetes mellitus increases the risk of rotator cuff tear repair surgery: A population-based cohort study.

    *J Diabetes Complications.* 2016; 30: 1473-1477

    View
    in Article
    - Scopus (32)
    - PubMed
    - Crossref
    - Google Scholar
20. - Passaretti D.
    - Candela V.
    - Venditto T.
    - Giannicola G.
    - Gumina S.

    Association between alcohol consumption and rotator cuff tear.

    *Acta Orthop.* 2016; 87: 165-168

    View
    in Article
    - Scopus (25)
    - PubMed
    - Crossref
    - Google Scholar
21. - Kerr R.
    - Resnick D.
    - Pineda C.
    - Haghighi P.

    Osteoarthritis of the glenohumeral joint: A radiologic-pathologic study.

    *Am J Roentgenol.* 1985; 144: 967-972

    View
    in Article
    - Scopus (68)
    - PubMed
    - Crossref
    - Google Scholar
22. - Gumina S.
    - Arceri V.
    - Carbone S.
    - et al.

    The association between arterial hypertension and rotator cuff tear: The influence on rotator cuff tear sizes.

    *J Shoulder Elb Surg.* 2013; 22: 229-232

    View
    in Article
    - Scopus (56)
    - PubMed
    - Abstract
    - Full Text
    - Full Text PDF
    - Google Scholar
23. - Baumgarten K.M.
    - Gerlach D.
    - Galatz L.M.
    - et al.

    Cigarette smoking increases the risk for rotator cuff tears.

    *Clin Orthop Relat Res.* 2010; 468: 1534-1541

    View
    in Article
    - Scopus (154)
    - PubMed
    - Crossref
    - Google Scholar
24. - Abboud J.A.
    - Kim J.S.

    The effect of hypercholesterolemia on rotator cuff disease.

    *Clin Orthop Relat Res.* 2010; 468: 1493-1497

    View
    in Article
    - Scopus (132)
    - PubMed
    - Crossref
    - Google Scholar
25. - Sherman S.L.
    - Lyman S.
    - Koulouvaris P.
    - Willis A.
    - Marx R.G.

    Risk factors for readmission and revision surgery following rotator cuff repair.

    *Clin Orthop Relat Res.* 2008; 466: 608-613

    View
    in Article
    - Scopus (57)
    - PubMed
    - Crossref
    - Google Scholar
26. - Day M.
    - Westermann R.
    - Duchman K.
    - et al.

    Comparison of short-term complications after rotator cuff repair: Open versus arthroscopic.

    *Arthroscopy.* 2018; 34: 1130-1136

    View
    in Article
    - Scopus (42)
    - PubMed
    - Abstract
    - Full Text
    - Full Text PDF
    - Google Scholar
27. - Korol E.
    - Johnston K.
    - Waser N.
    - et al.

    A systematic review of risk factors associated with surgical site infections among surgical patients.

    *PLoS One.* 2013; 8e83743

    View
    in Article
    - Scopus (222)
    - Crossref
    - Google Scholar
28. - Narani K.K.

    Deep vein thrombosis and pulmonary embolism. Prevention, management, and anaesthetic considerations.

    *Indian J Anaesth.* 2010; 54: 8-17

    View
    in Article
    - Scopus (16)
    - PubMed
    - Crossref
    - Google Scholar
29. - Khan N.A.
    - Quan H.
    - Bugar J.M.
    - Lemaire J.B.
    - Brant R.
    - Ghali W.A.

    Association of postoperative complications with hospital costs and length of stay in a tertiary care center.

    *J Gen Intern Med.* 2006; 21: 177-180

    View
    in Article
    - Scopus (0)
    - PubMed
    - Crossref
    - Google Scholar
30. - Reichman D.E.
    - Greenberg J.A.

    Reducing surgical site infections: A review.

    *Rev Obstet Gynecol.* 2009; 2: 212-221

    View
    in Article
    - PubMed
    - Google Scholar
31. - Schick C.W.
    - Westermann R.W.
    - Gao Y.
    - Wolf B.R.

    Thromboembolism following shoulder arthroscopy: A retrospective review.

    *Orthop J Sport Med.* 2014; 22325967114559506

    View
    in Article
    - Scopus (19)
    - PubMed
    - Crossref
    - Google Scholar
32. - Takahashi H.
    - Yamamoto N.
    - Nagamoto H.
    - Sano H.
    - Tanaka M.
    - Itoi E.

    Venous thromboembolism after elective shoulder surgery: A prospective cohort study of 175 patients.

    *J Shoulder Elb Surg.* 2014; 23: 605-612

    View
    in Article
    - Scopus (25)
    - PubMed
    - Abstract
    - Full Text
    - Full Text PDF
    - Google Scholar
33. - Zumstein M.A.
    - Jost B.
    - Hempel J.
    - Hodler J.
    - Gerber C.

    The clinical and structural long-term results of open repair of massive tears of the rotator cuff.

    *J Bone Joint Surg Am.* 2008; 90: 2423-2431

    View
    in Article
    - Scopus (343)
    - PubMed
    - Crossref
    - Google Scholar
34. - Wu X.L.
    - Briggs L.
    - Murrell G.A.C.

    Intraoperative determinants of rotator cuff repair integrity: An analysis of 500 consecutive repairs.

    *Am J Sports Med.* 2012; 40: 2771-2776

    View
    in Article
    - Scopus (89)
    - PubMed
    - Crossref
    - Google Scholar
35. - Sugaya H.
    - Maeda K.
    - Matsuki K.
    - Moriishi J.

    Repair integrity and functional outcome after arthroscopic double-row rotator cuff repair. A prospective outcome study.

    *J Bone Joint Surg Am.* 2007; 89: 953-960

    View
    in Article
    - Scopus (657)
    - PubMed
    - Crossref
    - Google Scholar
36. - Le B.T.N.
    - Wu X.L.
    - Lam P.H.
    - Murrell G.A.C.

    Factors predicting rotator cuff retears: An analysis of 1000 consecutive rotator cuff repairs.

    *Am J Sports Med.* 2014; 42: 1134-1142

    View
    in Article
    - Scopus (240)
    - PubMed
    - Crossref
    - Google Scholar
37. - Huijsmans P.E.
    - Pritchard M.P.
    - Berghs B.M.
    - van Rooyen K.S.
    - Wallace A.L.
    - de Beer J.F.

    Arthroscopic rotator cuff repair with double-row fixation.

    *J Bone Joint Surg Am.* 2007; 89: 1248-1257

    View
    in Article
    - Scopus (185)
    - PubMed
    - Crossref
    - Google Scholar
38. - Galatz L.M.
    - Ball C.M.
    - Teefey S.A.
    - Middleton W.D.
    - Yamaguchi K.

    The outcome and repair integrity of completely arthroscopically repaired large and massive rotator cuff tears.

    *J Bone Joint Surg Am.* 2004; 86: 219-224

    View
    in Article
    - Scopus (122)
    - PubMed
    - Abstract
    - Full Text
    - Full Text PDF
    - Google Scholar
39. - Rossi L.A.
    - Chahla J.
    - Verma N.N.
    - Millett P.J.
    - Ranalletta M.

    Rotator cuff retears.

    *JBJS Rev.* 2020; 8e0039

    View
    in Article
    - Scopus (30)
    - Crossref
    - Google Scholar
40. - Chona D.V.
    - Lakomkin N.
    - Lott A.
    - et al.

    The timing of retears after arthroscopic rotator cuff repair.

    *J Shoulder Elb Surg.* 2017; 26: 2054-2059

    View
    in Article
    - Scopus (45)
    - PubMed
    - Abstract
    - Full Text
    - Full Text PDF
    - Google Scholar
41. - Bishop J.
    - Klepps S.
    - Lo I.K.
    - Bird J.
    - Gladstone J.N.
    - Flatow E.L.

    Cuff integrity after arthroscopic versus open rotator cuff repair: a prospective study.

    *J Shoulder Elb Surg.* 2006; 15: 290-299

    View
    in Article
    - Scopus (442)
    - PubMed
    - Abstract
    - Full Text
    - Full Text PDF
    - Google Scholar
42. - Nakamura H.
    - Gotoh M.
    - Mitsui Y.
    - et al.

    Factors affecting clinical outcome in patients with structural failure after arthroscopic rotator cuff repair.

    *Arthroscopy.* 2016; 32: 732-739

    View
    in Article
    - Scopus (19)
    - PubMed
    - Abstract
    - Full Text
    - Full Text PDF
    - Google Scholar
43. - Tashjian R.Z.
    - Hollins A.M.
    - Kim H.-M.
    - et al.

    Factors affecting healing rates after arthroscopic double-row rotator cuff repair.

    *Am J Sports Med.* 2010; 38: 2435-2442

    View
    in Article
    - Scopus (251)
    - PubMed
    - Crossref
    - Google Scholar
44. - Neyton L.
    - Godenèche A.
    - Nové-Josserand L.
    - Carrillon Y.
    - Cléchet J.
    - Hardy M.B.

    Arthroscopic suture-bridge repair for small to medium size supraspinatus tear: Healing rate and retear pattern.

    *Arthroscopy.* 2013; 29: 10-17

    View
    in Article
    - Scopus (106)
    - PubMed
    - Abstract
    - Full Text
    - Full Text PDF
    - Google Scholar
45. - Chen A.L.
    - Shapiro J.A.
    - Ahn A.K.
    - Zuckerman J.D.
    - Cuomo F.

    Rotator cuff repair in patients with type I diabetes mellitus.

    *J Shoulder Elb Surg.* 2003; 12: 416-421

    View
    in Article
    - Scopus (110)
    - PubMed
    - Abstract
    - Full Text
    - Full Text PDF
    - Google Scholar
46. - Bishop J.Y.
    - Santiago-Torres J.E.
    - Rimmke N.
    - Flanigan D.C.

    Smoking predisposes to rotator cuff pathology and shoulder dysfunction: A systematic review.

    *Arthroscopy.* 2015; 31: 1598-1605

    View
    in Article
    - Scopus (60)
    - PubMed
    - Abstract
    - Full Text
    - Full Text PDF
    - Google Scholar
47. - Tanaka M.
    - Hayashida K.
    - Kobayashi A.
    - Kakiuchi M.

    Arthroscopic rotator cuff repair with absorbable stures in the medial-row anchors.

    *Arthroscopy.* 2015; 31: 2099-2105

    View
    in Article
    - Scopus (13)
    - PubMed
    - Abstract
    - Full Text
    - Full Text PDF
    - Google Scholar
48. - Smilowitz N.R.
    - Beckman J.A.
    - Sherman S.E.
    - Berger J.S.

    Hospital readmission after perioperative acute myocardial infarction associated with noncardiac surgery.

    *Circulation.* 2018; 137: 2332-2339

    View
    in Article
    - Scopus (34)
    - PubMed
    - Crossref
    - Google Scholar
49. - Clair A.J.
    - Evangelista P.J.
    - Lajam C.M.
    - Slover J.D.
    - Bosco J.A.
    - Iorio R.

    Cost analysis of total joint arthroplasty readmissions in a bundled payment care improvement initiative.

    *J Arthroplasty.* 2016; 31: 1862-1865

    View
    in Article
    - Scopus (98)
    - PubMed
    - Abstract
    - Full Text
    - Full Text PDF
    - Google Scholar
50. WHO Scientific Group on the Burden of Musculoskeletal Conditions at the Start of the New Millennium.  WHO,
    Geneva, Switzerland2003 (The burden of musculoskeletal conditions at the start of the new millenium: Report of a WHO scientific group)

    View
    in Article
    - Google Scholar
51. - Trogdon J.G.
    - Falchook A.D.
    - Basak R.
    - Carpenter W.R.
    - Chen R.C.

    Total Medicare costs associated with diagnosis and treatment of prostate cancer in elderly men.

    *JAMA Oncol.* 2019; 5: 60-66

    View
    in Article
    - Scopus (29)
    - PubMed
    - Crossref
    - Google Scholar
52. - Cipriano L.E.
    - Romanus D.
    - Earle C.C.
    - et al.

    Lung cancer treatment costs, including patient responsibility, by disease stage and treatment modality, 1992 to 2003.

    *Value Heal J Int Soc Pharmacoeconomics Outcomes Res.* 2011; 14: 41-52

    View
    in Article
    - Scopus (89)
    - PubMed
    - Abstract
    - Full Text
    - Full Text PDF
    - Google Scholar
53. - Hollenbeak C.S.
    - Nikkel L.E.
    - Schaefer E.W.
    - Alemao E.
    - Ghahramani N.
    - Raman J.D.

    Determinants of Medicare all-cause costs among elderly patients with renal cell carcinoma.

    *J Manag Care Pharm.* 2011; 17: 610-620

    View
    in Article
    - Scopus (20)
    - PubMed
    - Crossref
    - Google Scholar
54. - Losina E.
    - Paltiel A.D.
    - Weinstein A.M.
    - et al.

    Lifetime medical costs of knee osteoarthritis management in the United States: impact of extending indications for total knee arthroplasty.

    *Arthritis Care Res (Hoboken).* 2015; 67: 203-215

    View
    in Article
    - Scopus (218)
    - PubMed
    - Crossref
    - Google Scholar
55. - Bitton R.

    The economic burden of osteoarthritis.

    *Am J Manag Care.* 2009; 15: S230-S235

    View
    in Article
    - PubMed
    - Google Scholar
56. - Reveille J.D.
    - Ximenes A.
    - Ward M.M.

    Economic considerations of the treatment of ankylosing spondylitis.

    *Am J Med Sci.* 2012; 343: 371-374https://doi.org/10.1097/MAJ.0b013e3182514093

    View
    in Article
    - Scopus (42)
    - PubMed
    - Abstract
    - Full Text
    - Full Text PDF
    - Google Scholar
57. - Akkoç N.
    - Direskeneli H.
    - Erdem H.
    - et al.

    Direct and indirect costs associated with ankylosing spondylitis and related disease activity scores in Turkey.

    *Rheumatol Int.* 2015; 35: 1473-1478

    View
    in Article
    - Scopus (10)
    - PubMed
    - Crossref
    - Google Scholar
58. - Verstappen S.M.M.
    - Jacobs J.W.G.
    - van der Heijde D.M.
    - et al.

    Utility and direct costs: Ankylosing spondylitis compared with rheumatoid arthritis.

    *Ann Rheum Dis.* 2007; 66: 727-731

    View
    in Article
    - Scopus (26)
    - PubMed
    - Crossref
    - Google Scholar
59. - Perencevich E.N.
    - Sands K.E.
    - Cosgrove S.E.
    - Guadagnoli E.
    - Meara E.
    - Platt R.

    Health and economic impact of surgical site infections diagnosed after hospital discharge.

    *Emerg Infect Dis.* 2003; 9: 196-203

    View
    in Article
    - Scopus (377)
    - PubMed
    - Crossref
    - Google Scholar
60. - Olasupo O.
    - Xiao H.
    - Brown J.D.

    Relative clinical and cost burden of community-acquired pneumonia hospitalizations in older adults in the United States—A cross-sectional analysis.

    *Vaccines.* 2018; 6

    View
    in Article
    - Scopus (24)
    - Crossref
    - Google Scholar
61. - Knust R.E.
    - Portela M.C.
    - Pereira CC. de A.
    - Fortes G.B.

    Estimated costs of advanced lung cancer care in a public reference hospital.

    *Rev Saude Publica.* 2017; 51: 53

    View
    in Article
    - PubMed
    - Crossref
    - Google Scholar
62. - Nadeem H.
    - Jayakrishnan T.T.
    - Rajeev R.
    - Johnston F.M.
    - Gamblin T.C.
    - Turaga K.K.

    Cost differential of chemotherapy for solid tumors.

    *J Oncol Pract.* 2016; 12 (251): e299-e307

    View
    in Article
    - Scopus (7)
    - PubMed
    - Crossref
    - Google Scholar
63. - Cancienne J.M.
    - Dempsey I.J.
    - Holzgrefe R.E.
    - Brockmeier S.F.
    - Werner B.C.

    Is hepatitis C infection associated with a higher risk of complications after total shoulder arthroplasty?.

    *Clin Orthop Relat Res.* 2016; 474: 2664-2669

    View
    in Article
    - Scopus (58)
    - PubMed
    - Crossref
    - Google Scholar
64. - Yoshihara H.
    - Yoneoka D.

    Understanding the statistics and limitations of large database analyses.

    *Spine (Phila Pa 1976).* 2014; 39: 1311-1312

    View
    in Article
    - Scopus (58)
    - PubMed
    - Crossref
    - Google Scholar

## Article info

### Publication history

Published online: August 28, 2022

Accepted:
June 28,
2022

Received:
February 7,
2022

### Footnotes

The authors report the following potential conflicts of interest or sources of funding: J.C.L. reports being a paid consultant for DJO Orthopaedics, Stryker, and Globus Medical.

He receives royalties from DJO Orthopaedics, Stryker, Globus Medical, and Innomed. All remaining authors, their immediate families, and any research foundation which they are affiliated have not received any financial payments or other benefits from any commercial entity related to the subject of this article. Full ICMJE author disclosure forms are available for this article online, as supplementary material.

### Identification

DOI: https://doi.org/10.1016/j.asmr.2022.06.015

### Copyright

© 2022 The Authors. Published by Elsevier Inc. on behalf of the Arthroscopy Association of North America.

### User license

Creative Commons Attribution – NonCommercial – NoDerivs (CC BY-NC-ND 4.0) |

How you can reuse 

Creative Commons Attribution – NonCommercial – NoDerivs (CC BY-NC-ND 4.0)

## Permitted

### For non-commercial purposes:

- Read, print & download
- Redistribute or republish the final article
- Text & data mine
- Translate the article (private use only, not for distribution)
- Reuse portions or extracts from the article in other works

## Not Permitted

- Sell or re-use for commercial purposes
- Distribute translations or adaptations of the article

  
Elsevier's open access license policy

### ScienceDirect

Access this article on ScienceDirect

## Related Articles

Hide CaptionDownloadSee figure in Article

Toggle Thumbstrip

- Download Hi-res image
- Download .PPT

- Home
- Articles & Issues
- Articles In Press
- Current Issue
- List of Issues
- Collections
- ASMAR Special Issue: Rehabilitation and Return to Sport in Athletes
- Authors
- Ethics in Publishing
- Instructions for Authors
- Permissions
- New Content Alerts
- Submit your Manuscript
- Reviewers
- Review for the Journal
- Sign Up to Review
- Checklists/Templates
- Original Article Template [PDF]
- Original Article Checklist [PDF]
- Systematic Review & Meta-analysis Template [PDF]
- Systematic Review & Meta-analysis Checklist [PDF]
- Journal Info
- About the Journal
- Contact Information
- Editors and Editorial Board
- Advertising
- Reprints
- AANA
- Arthroscopy
- Arthroscopy Techniques
- Follow Us
- Twitter
- Facebook
- Instagram
- LinkedIn

---

**The content on this site is intended for healthcare professionals.**

---
